# Supplementary material for: Integrated active sensor system for real time vibration monitoring
Source: PubMed Central journal article supplement (PMC4633595; doi:10.1038/srep16063), 2015-11-05
Supplement: srep16063-s1.pdf [file srep16063-s1.pdf]

## **Integrated active sensor system for real time vibration monitoring**

Qijie Liang<sup>1</sup>, Xiaoqin Yan<sup>1,\*</sup>, Xinqin Liao<sup>1</sup>, Shiyao Cao<sup>1</sup>, Shengnan Lu<sup>1</sup>, Xin Zheng<sup>1</sup>, Yue Zhang<sup>1,2,\*</sup>

<sup>1</sup>State Key Laboratory for Advanced Metals and Materials, School of Materials Science and Engineering, University of science and technology Beijing, Beijing, 100083, China

<sup>2</sup> Key Laboratory of New Energy Materials and Technologies, University of Science and Technology Beijing, Beijing, 100083, China

\* Corresponding author: Key Laboratory of New Energy Materials and Technologies, University of science and technology Beijing, Beijing, 100083, China.

E-mail: yuezhang@ustb.edu.cn (Y. Zhang), xqyan@mater.ustb.edu.cn (X. Yan).

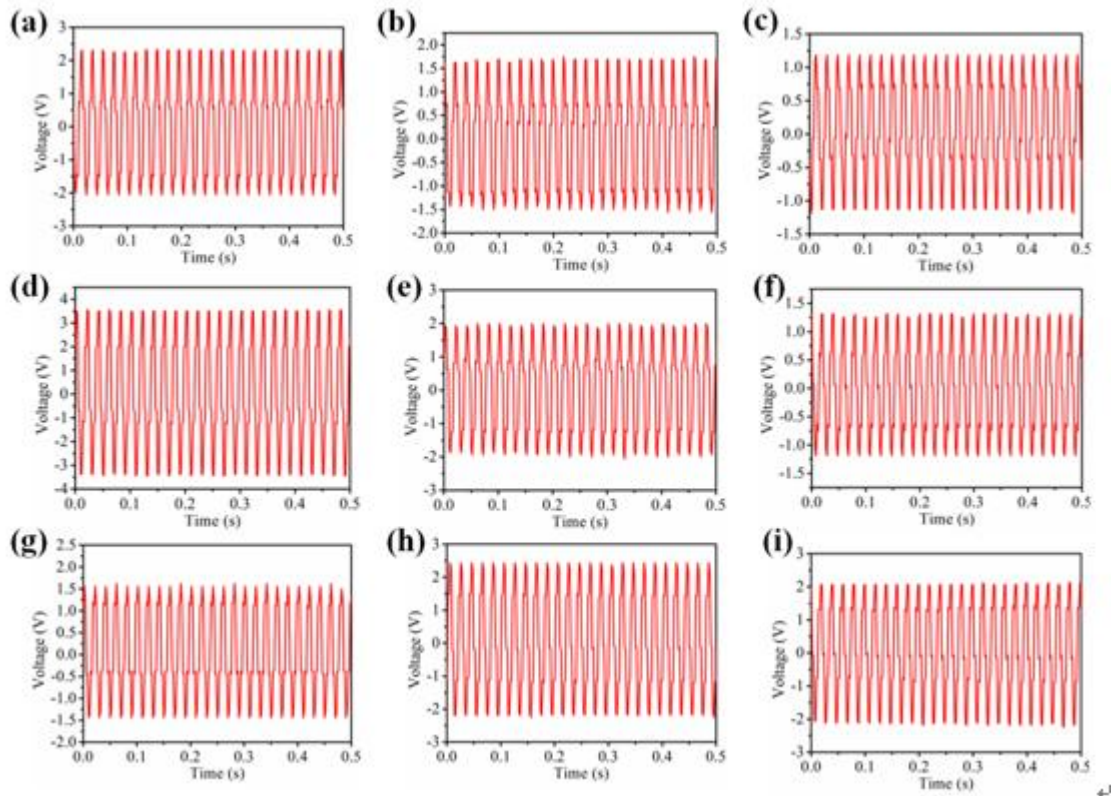

**Figure S1.** The outputs of nine pixels in the sensor array with all detected units in on-state.

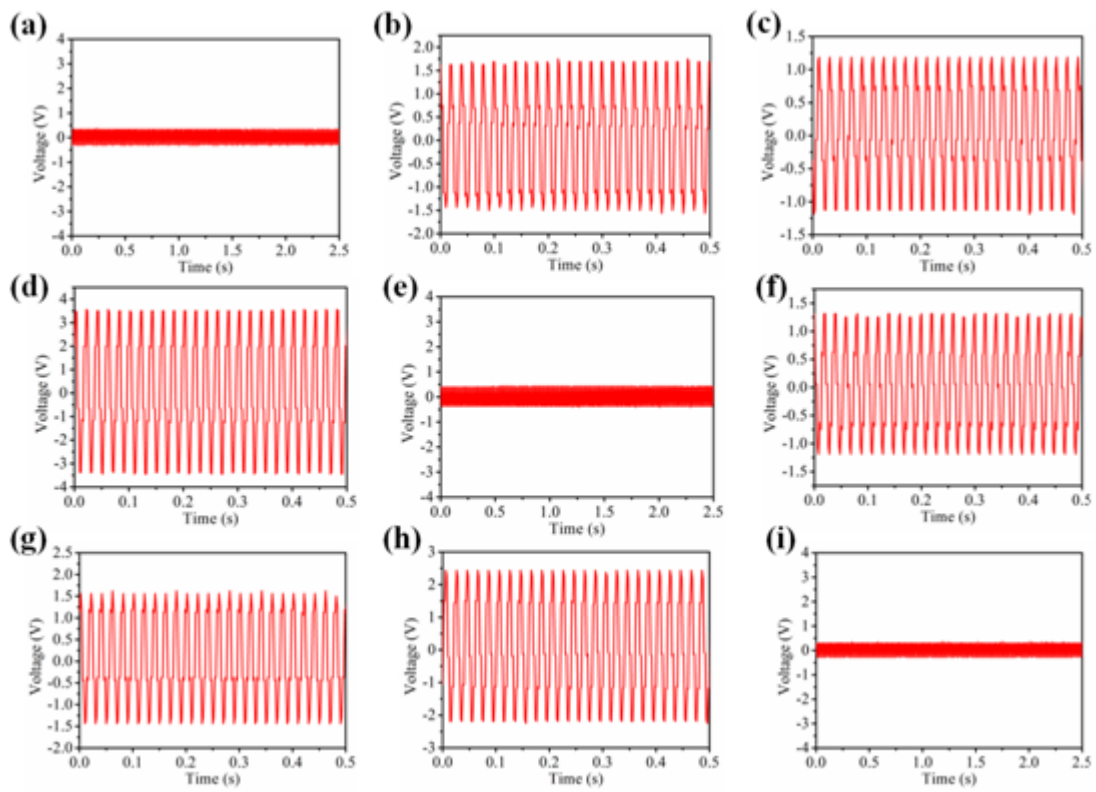

**Figure S2.** The outputs of nine pixels in the sensor array with 3 units in off-state.

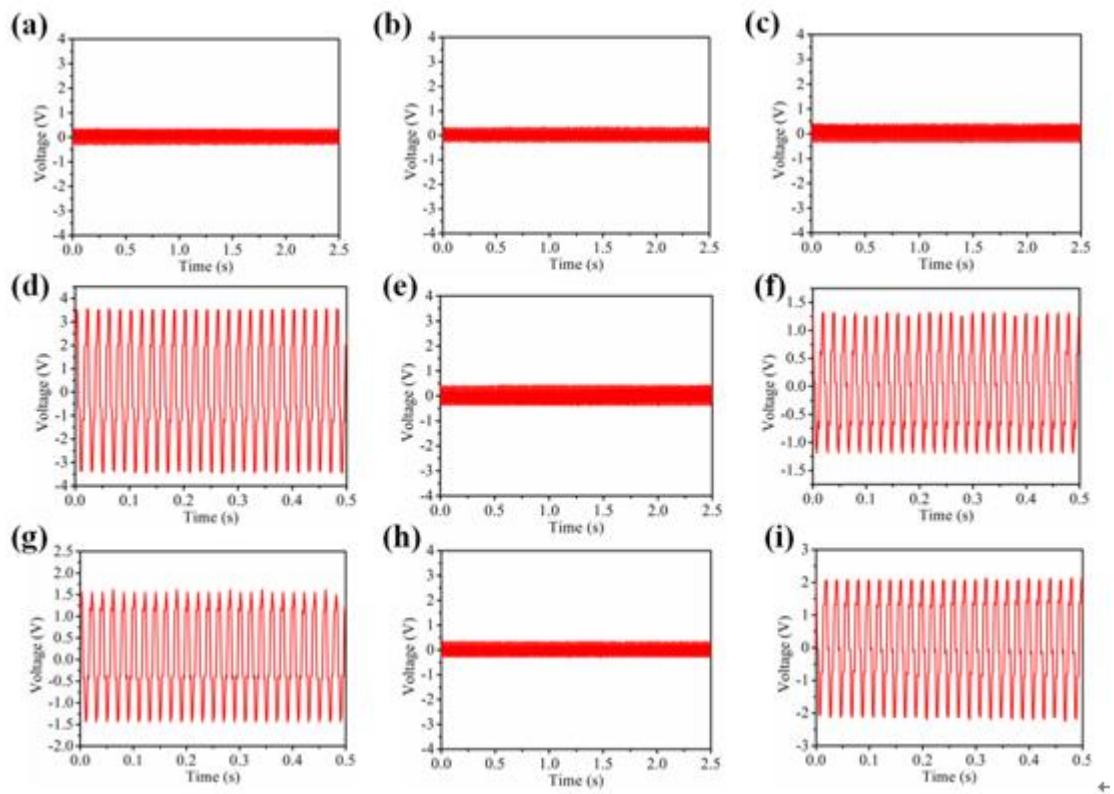

**Figure S3.** The outputs of nine pixels in the sensor array with 5 units in off-state.

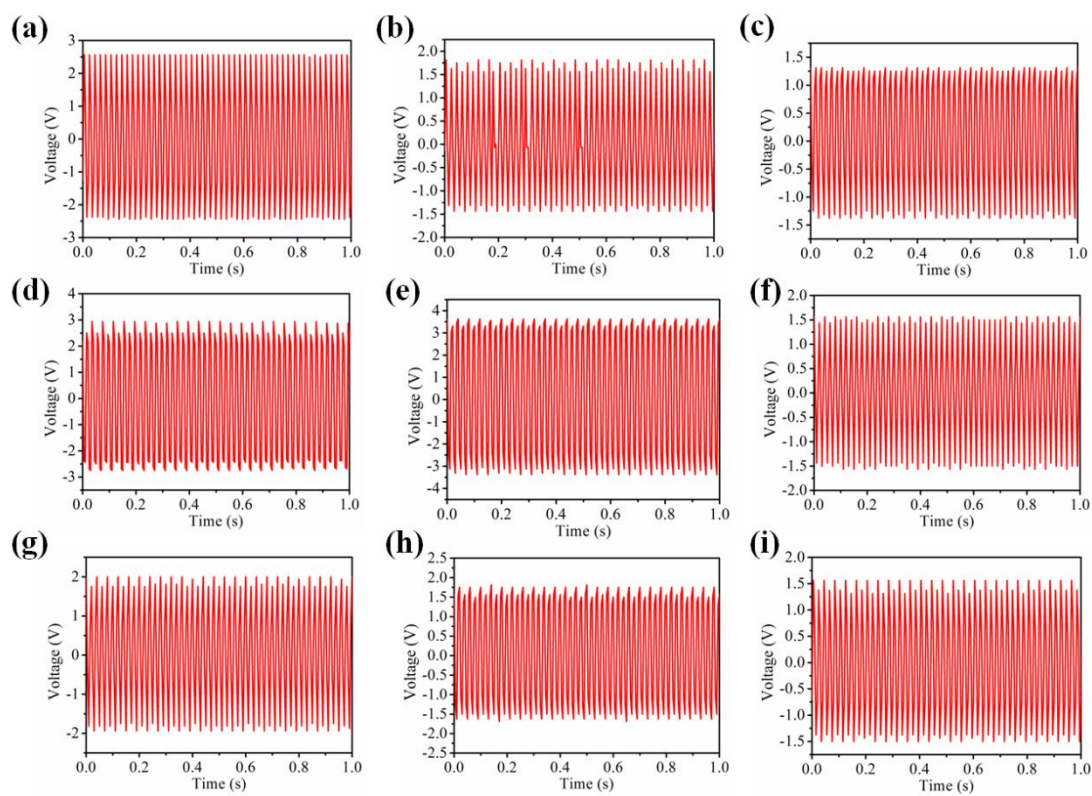

**Figure S4.** The outputs of nine pixels in the sensor array with vibration amplitude of normal set value.

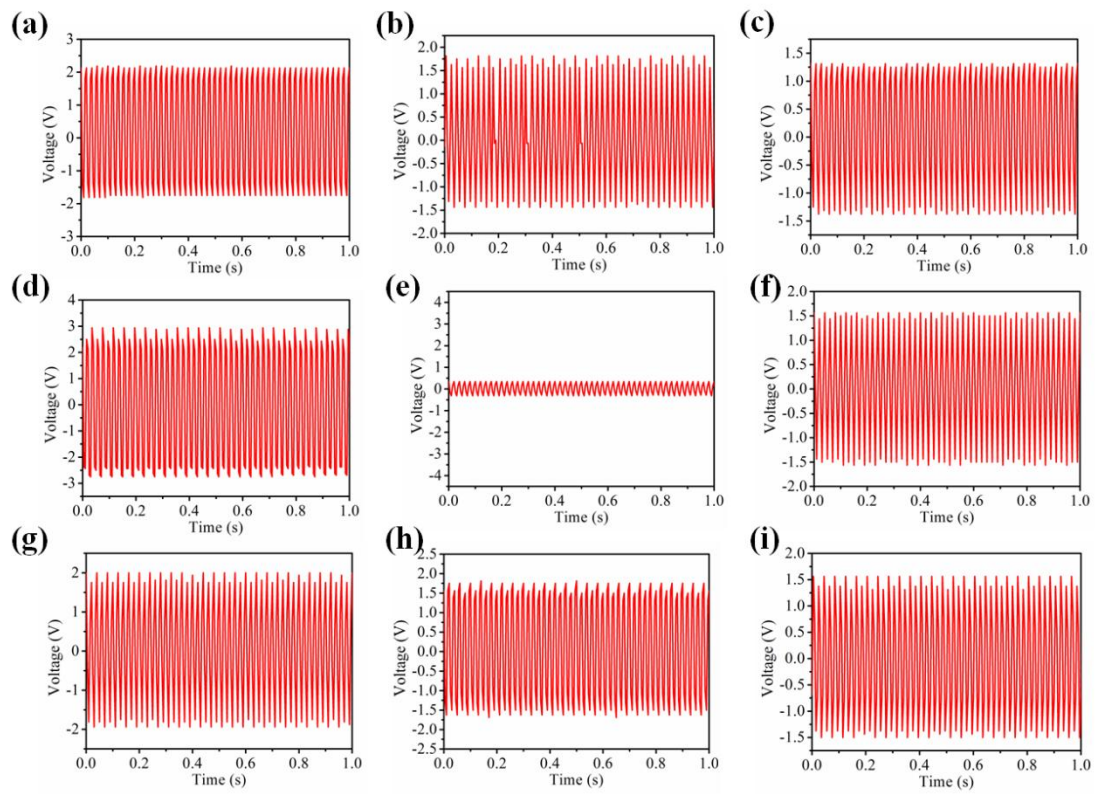

**Figure S5.** The outputs of nine pixels in the sensor array with vibration amplitude of 1 unit deviated from normal set value.

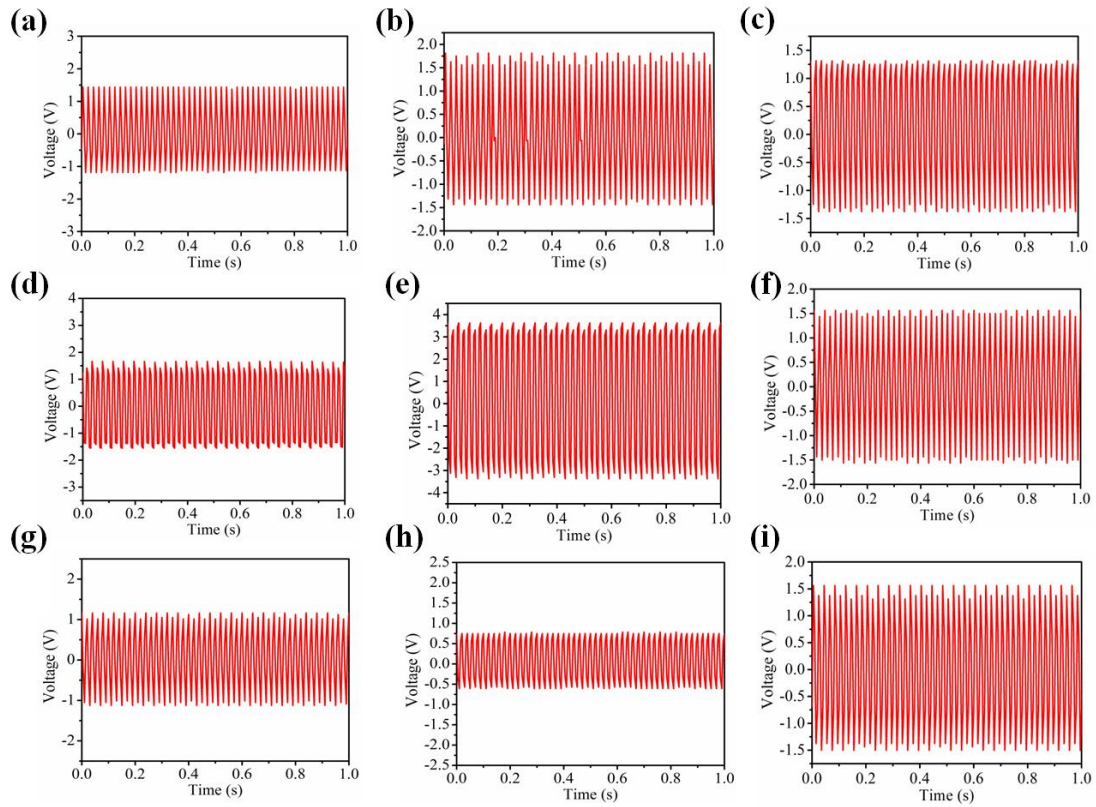

**Figure S6.** The outputs of nine pixels in the sensor array with vibration amplitude of 4 units deviated from normal set value.

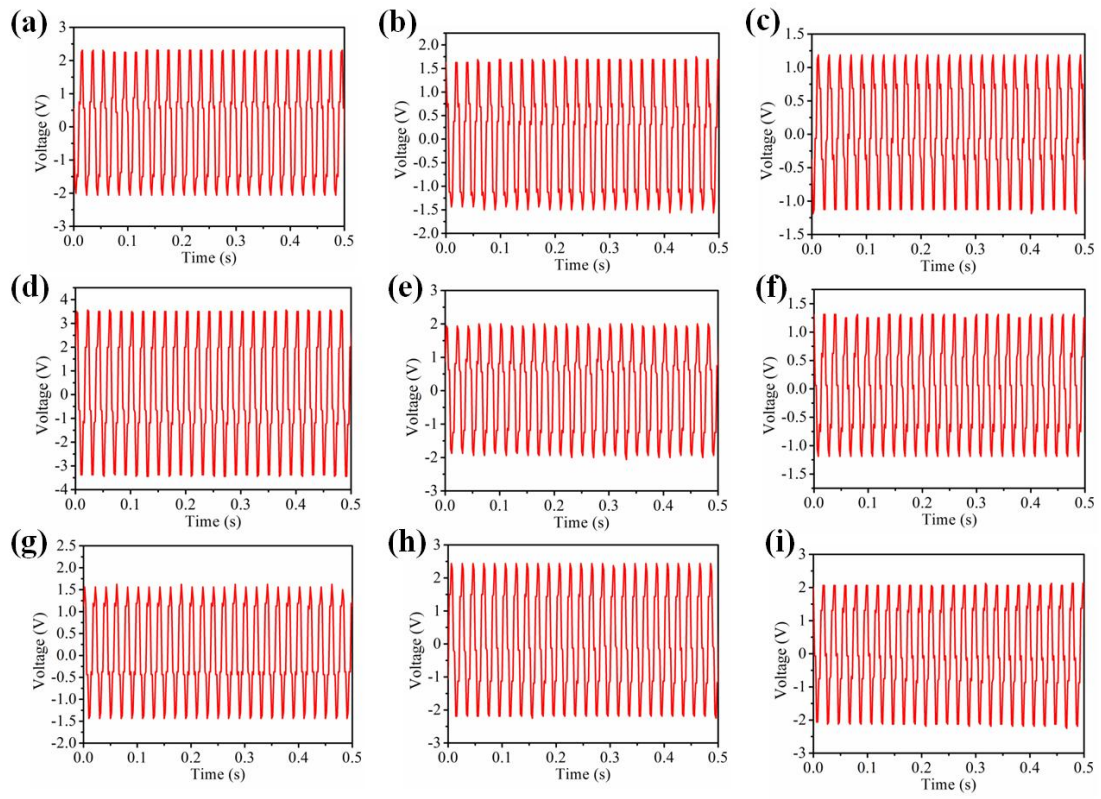

**Figure S7.** The outputs of nine pixels in the sensor array with vibration frequency of all units to be 50 Hz.



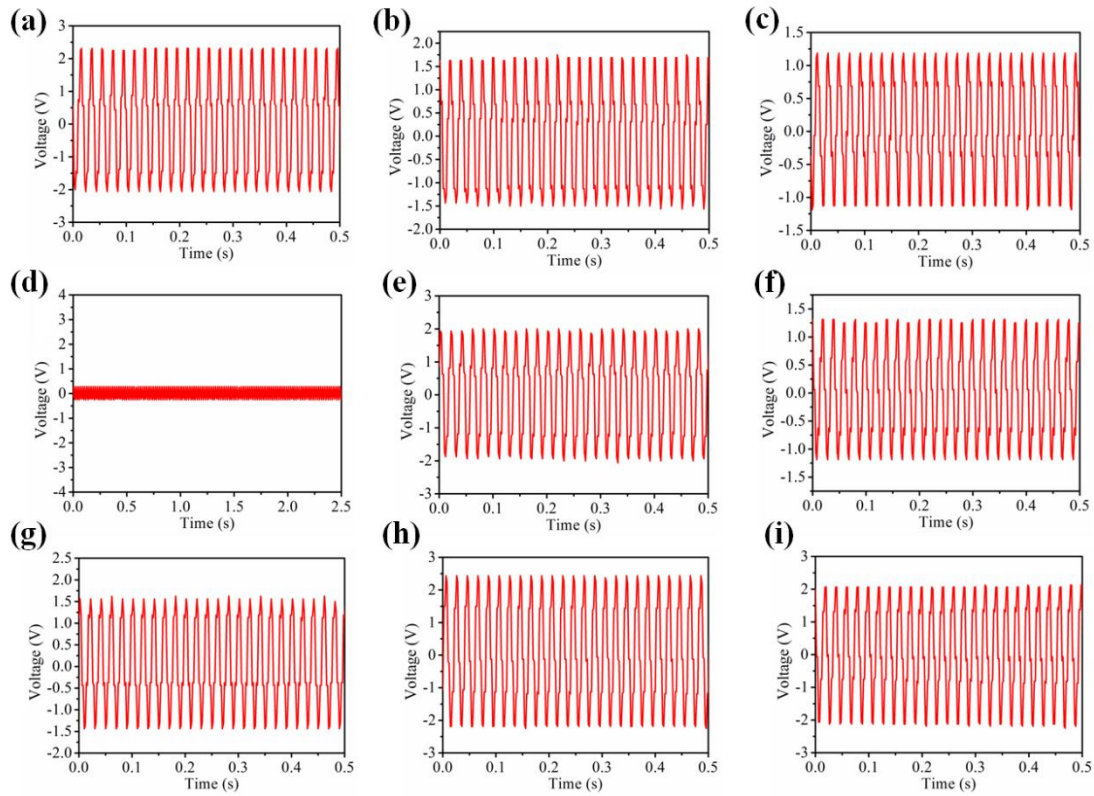

**Figure S8.** The outputs of nine pixels in the sensor array with vibration frequency of 1 unit deviated from normal set value of 50 Hz.

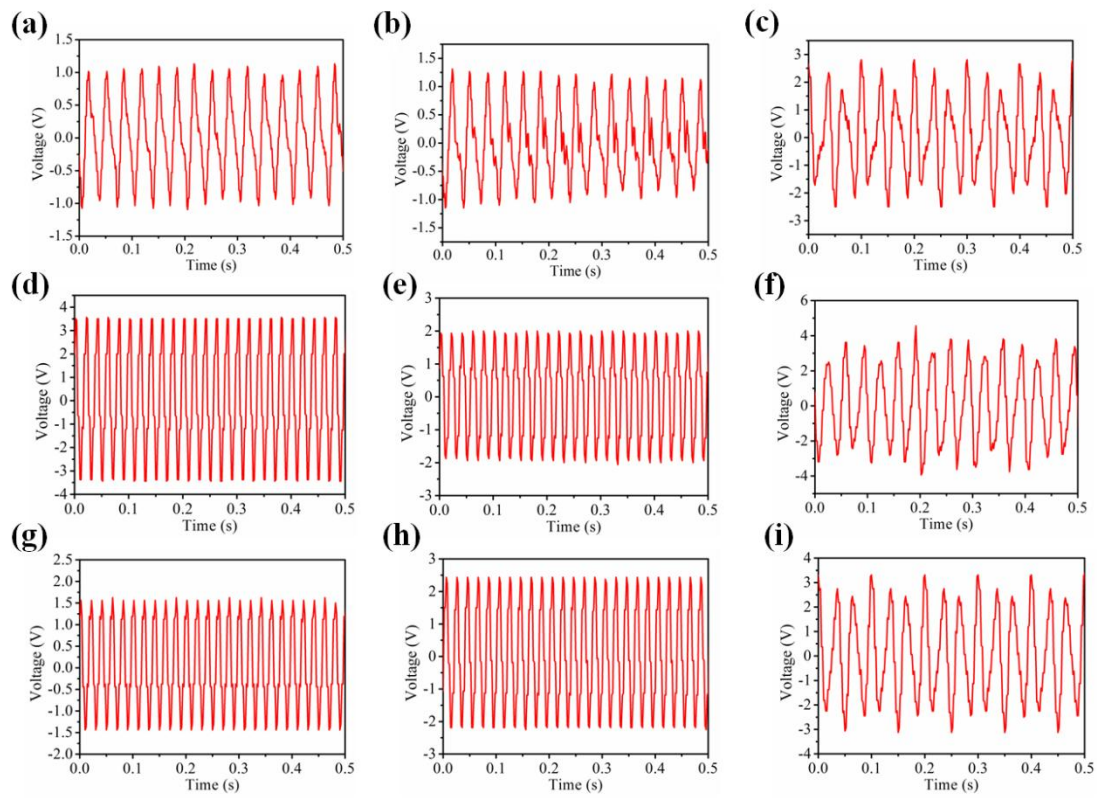

**Figure S9.** The outputs of nine pixels in the sensor array with vibration frequency of 5 units deviated from normal set value of 50 Hz.

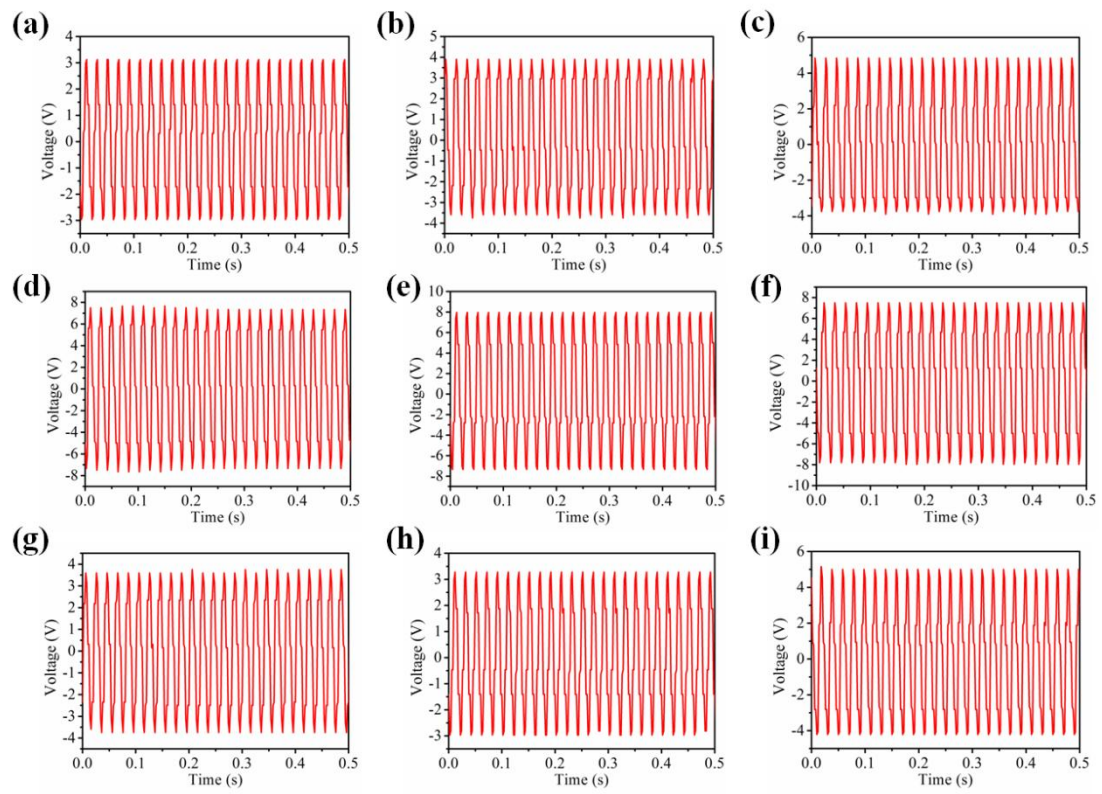

**Figure S10.** The outputs of nine pixels in the sensor array with vibration frequency of all units to be 50 Hz.

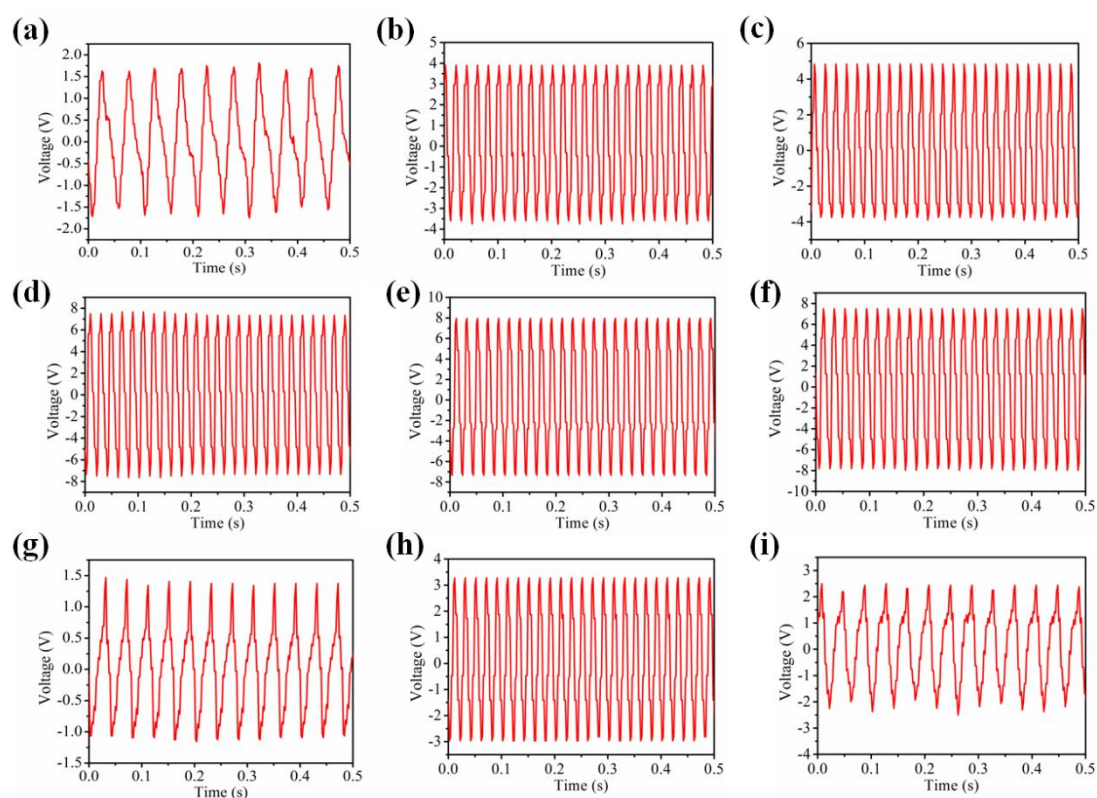

**Figure S11.** The outputs of nine pixels in the sensor array with vibration frequency of 3 units deviated from normal set value of 50 Hz.

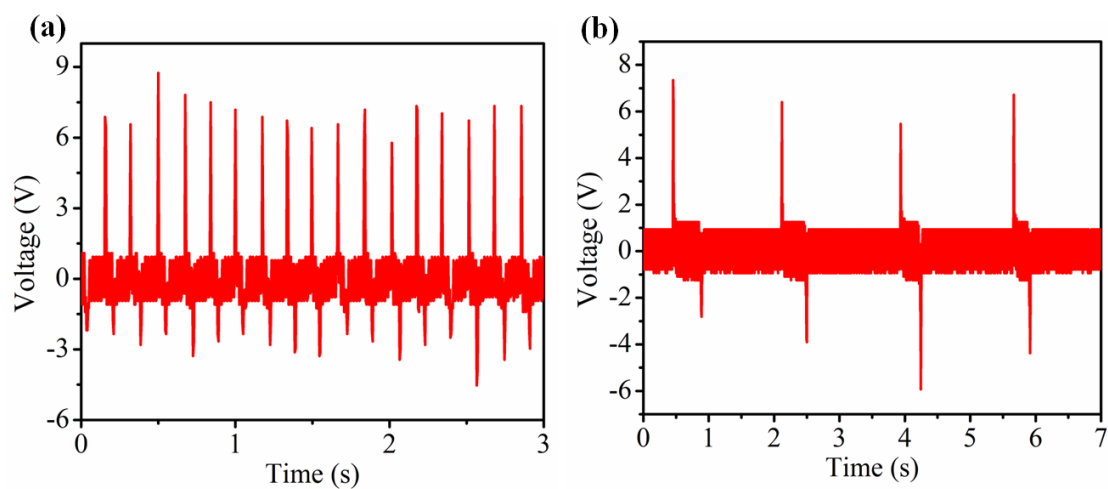

**Figure S12.** The outputs of 2 pixels in the sensor array when two pixels in the matrix were knocked by two fingers under different frequency.
